# Supplementary material for: The Cat–Owner Relationship: Validation of the Italian C/DORS for Cat Owners and Correlation with the LAPS
Source: MDPI journal article supplement (doi:10.3390/ani13010069), 2022-12-24
Supplement: s1 [file s1]

**Table S1.** Demographic information of the cats

| Demographic Factor                                     | Mdn (Min-Max)  |
|--------------------------------------------------------|----------------|
| Age (years)                                            | 8 (0.5-25)     |
| Age at adoption (years)                                | 0.25 (0.25-25) |
|                                                        | % (N)          |
| <b>Sex</b>                                             |                |
| Female                                                 | 52.2(618)      |
| Male                                                   | 47.8(565)      |
| <b>Neutering Status</b>                                |                |
| Neutered                                               | 96.4 (1140)    |
| Intact                                                 | 3.6 (43)       |
| <b>Age when neutered</b>                               |                |
| Before 3 years                                         | 91.6(1062)     |
| After 3 years                                          | 4.7(54)        |
| Never                                                  | 3.7 (43)       |
| <b>Breeds</b>                                          |                |
| Mixbreed                                               | 90.5 (1070)    |
| Ragdoll                                                | 1.5 (18)       |
| British                                                | 0.8 (10)       |
| Maine Coon                                             | 0.8 (9)        |
| Norwegian Forest Cat                                   | 0.8 (9)        |
| Persian Cat                                            | 0.8 (9)        |
| Siamese                                                | 0.8 (9)        |
| Siberian                                               | 0.8 (9)        |
| Thai cat                                               | 0.5 (6)        |
| Chartreux                                              | 0.4 (5)        |
| Scottish fold                                          | 0.3 (4)        |
| Other                                                  | 1.9 (23)       |
| <b>Origin of the cat</b>                               |                |
| Professional Breeder                                   | 2.7 (32)       |
| Private (e.g., Friends, acquaintances, family breeder) | 29.3 (347)     |
| Given as a gift                                        | 3.6 (42)       |
| Born at home                                           | 4.0 (47)       |
| Pet shop                                               | 0.1 (1)        |
| Found/Shelter/Sanctuary                                | 60 (710)       |
| <b>Walking with the cat</b>                            |                |
| With a leash                                           | 3.9 (46)       |
| Without a leash                                        | 13.0 (153)     |
| I don't walk with my cat                               | 82.5 (973)     |
| Other methods of containment                           | 0.6 (7)        |
| <b>Health issues</b>                                   |                |
| Yes                                                    | 21.6 (255)     |
| No                                                     | 78.4 (928)     |
| <b>Behaviour issues</b>                                |                |
| Yes                                                    | 9.9 (117)      |
| No                                                     | 90.1 (1066)    |
| <b>Living Spaces</b>                                   |                |
| House and garden                                       | 40.1 (474)     |
| House and Terraces/Balconies/Roofs                     | 30.3 (355)     |
| Exclusively in the house                               | 29.1 (345)     |
| Predominantly in the house but with access outdoor     | 0.17 (2)       |
| Predominantly in the garden but with access indoor     | 0.17 (2)       |

|                   |            |
|-------------------|------------|
| <b>Other Pets</b> |            |
| None              | 30.3 (358) |
| Only dogs         | 10.7 (127) |
| Only cats         | 39.0 (461) |
| Dogs and cats     | 20 (237)   |

**Table S2:** Results of C/DORS EFA and factor loading including items below cut off. Removed items are in bold.

| Items                                                                          | Loadings                      |                                     |                      |
|--------------------------------------------------------------------------------|-------------------------------|-------------------------------------|----------------------|
|                                                                                | Pet- Owner Interactions (POI) | Perceived Emotional Closeness (PEC) | Perceived Costs (PC) |
| 26 How often do you pet your cat?                                              | 0.82                          | -0.08                               | -0.04                |
| 21 How often do you cuddle your cat?                                           | 0.82                          | -0.04                               | 0.01                 |
| 15 How often do you talk to your cat?                                          | 0.66                          | 0.01                                | 0.06                 |
| 9 Ho often do you spend time enjoying watching your cat?                       | 0.64                          | -0.02                               | 0.05                 |
| 30 How often do you hug your cat?                                              | 0.61                          | 0.20                                | -0.07                |
| 4 How often do you kiss your cat?                                              | 0.48                          | 0.24                                | -0.02                |
| 23 How often do you have your cat with you while relaxing, e.g., watching TV?  | 0.43                          | 0.22                                | 0.02                 |
| 7 How often do you play games with your cat?                                   | 0.41                          | 0.08                                | 0.04                 |
| 24 My cat is there whenever I need to be comforted.                            | -0.05                         | 0.86                                | -0.02                |
| 18 If everyone else left me, my cat would still be there for me.               | -0.06                         | 0.79                                | -0.04                |
| 20 My cat helps me get through tough times.                                    | 0.04                          | 0.71                                | 0.01                 |
| 22 My cat provides me with constant companionship.                             | 0.08                          | 0.66                                | 0.03                 |
| 32 My cat is constantly attentive to me.                                       | -0.03                         | 0.65                                | 0.08                 |
| 17 I would like to have my cat near me all the time.                           | 0.16                          | 0.54                                | 0.068                |
| 5 I wish my cat and I never had to be apart.                                   | 0.16                          | 0.48                                | 0.08                 |
| 25 How traumatic do you think it will be for you when your cat dies?           | 0.16                          | 0.42                                | 0.01                 |
| 2 My cat gives me a reason to get up in the morning                            | 0.08                          | 0.39                                | 0.08                 |
| 13 How often do you tell your cat things you don't tell anyone else?           | 0.27                          | 0.31                                | -0.01                |
| 10 It is annoying that sometimes I have to change my plans because of my cat.  | 0.004                         | -0.01                               | 0.75                 |
| 8 It bothers me that my cat stops me doing things I enjoyed before I owned it. | -0.05                         | 0.03                                | 0.69                 |
| 6 My cat makes too much mess.                                                  | 0.01                          | -0.04                               | 0.56                 |
| 11 My cat costs too much money.                                                | 0.03                          | -0.04                               | 0.50                 |
| 3 There are major aspects of owning a cat I don't like.                        | 0.000                         | 0.14                                | 0.44                 |
| 1 How hard is it to look after your cat?                                       | 0.03                          | 0.03                                | 0.42                 |
| <b>12 How often do you buy your cat presents?</b>                              | <b>0.24</b>                   | <b>0.14</b>                         | <b>0.05</b>          |

|                                                |      |       |      |
|------------------------------------------------|------|-------|------|
| 28 How often do you give your cat food treats? | 0.24 | -0.02 | 0.04 |
| 31 How often do you groom your cat?            | 0.32 | 0.07  | 0.04 |
|                                                | POI  | PEC   | PC   |
| Variance explained                             | 14%  | 14%   | 7%   |

**Table S3:** Descriptive statistics of removed items

| Item     | Mean | Standard<br>Deviation | Median | Skewness | Kurtosis |
|----------|------|-----------------------|--------|----------|----------|
| CDORS 12 | 2.17 | 0,95                  | 2      | 0.74     | 0.51     |
| CDORS 14 | 1.30 | 0.81                  | 1      | 3.23     | 11.36    |
| CDORS 16 | 1.19 | 0.72                  | 1      | 4.50     | 21.73    |
| CDORS 19 | 1.04 | 0.34                  | 1      | 12.0     | 173.03   |
| CDORS 27 | 1.22 | 0.71                  | 1      | 4.67     | 25.09    |
| CDORS 28 | 3.08 | 1.44                  | 3      | -0.16    | -1.08    |
| CDORS 29 | 1.50 | 0.71                  | 1      | 2.27     | 9.96     |
| CDORS 31 | 3.87 | 1.58                  | 4      | -0.20    | -0.76    |
